# Supplementary material for: Cytokinin and gibberellic acid-mediated waterlogging tolerance of mungbean (Vigna radiata L. Wilczek)
Source: PeerJ. 2022 Feb 4;10:e12862. doi: 10.7717/peerj.12862 (PMC8820211; doi:10.7717/peerj.12862)
Supplement: Supplemental Information 1 [file peerj-10-12862-s001.xlsx]

## Sheet: Figure 1
Treat	Rep	Pn_1	Pn_2	Gs_1	Gs_2	Tr_1	Tr_2	WUEi (Pn/Gs)_1	WUEi (Pn/Gs)_2	WUE (Pn/Tr)_1	WUE (Pn/Tr)_2	WUE_1	WUE_2
Control	1	40.8798	36.4543	0.442868	0.563445	6.16041	6.27595	92.3069	64.699	6.63589	5.80857	98.9428	70.5076		1	Denotes "After stress" measurements
Control	2	37.3855	38.5817	0.44192	0.599141	6.22487	7.29703	84.598	64.395	6.00584	5.28732	90.6038	69.6823		2	Denotes "After Recovery" measurements
Control	3	37.3064	45.6953	0.438556	0.77	5.99067	6.5	85.0664	59.3446	6.22742	7.03005	91.2938	66.3746
Control	4	38.8851	44.5351	0.430282	0.540418	6.24337	7.10703	90.3713	82.4086	6.22823	6.26635	96.5996	88.6749
WL	1	23.1125	24.3367	0.0558952	0.298068	1.50835	4.42611	413.496	81.6483	15.323	5.49844	428.819	87.1467
WL	2	24.9854	25.035	0.0319679	0.253969	1.48208	4.8252	781.578	98.5749	16.8583	5.18839	798.436	103.763
WL	3	17.5483	22.078	0.0489068	0.314162	1.83258	4.32082	358.811	70.2759	9.57575	5.10968	368.387	75.3856		Pn_1			Pn_2
WL	4	20.6647	24.4553	0.0337167	0.29	1.59814	3.94308	612.893	84.3286	12.9305	6.20209	625.823	90.5307		Treat	Mean	Homogeneous Groups	Treat	Mean	Homogeneous Groups
CK+WL	1	26.4708	33.2212	0.0315677	0.200302	1.02138	3.15356	838.541	165.855	25.9168	10.5345	864.458	176.39		Control	38.618	A	Control	41.317	A
CK+WL	2	32.5444	32.2042	0.0269615	0.153473	1.11839	2.56144	1207.07	209.836	29.0994	12.5727	1236.17	222.409		WL	21.578	C	WL	23.978	C
CK+WL	3	27.8573	34.4039	0.0225441	0.230812	1.03029	2.82075	1235.68	149.056	27.0384	12.1967	1262.72	161.253		CK+WL	29.518	B	CK+WL	32.7	B
CK+WL	4	31.202	30.9794	0.0211744	0.159994	1.14059	3	1473.57	193.629	27.356	10.3265	1500.93	203.955		GA3+WL	27.33	B	GA3+WL	30.048	B
GA3+WL	1	26.1805	27.6872	0.0265762	0.211622	1.1106	3.43217	985.112	130.833	23.5732	8.06698	1008.68	138.9
GA3+WL	2	28.7852	32.7099	0.0337013	0.234803	1.40197	3.85371	854.127	139.308	20.5319	8.4879	874.659	147.796		Gs_1			Gs_2
GA3+WL	3	25.3918	31.8084	0.0296412	0.218024	1.20879	3.46312	856.639	145.894	21.006	9.1849	877.645	155.079		Treat	Mean	Homogeneous Groups	Treat	Mean	Homogeneous Groups
GA3+WL	4	28.9575	27.981	0.0339176	0.172563	1.25189	3.02275	853.76	162.15	23.1311	9.25679	876.892	171.406		Control	0.4385	A	Control	0.6175	A
															WL	0.0427	B	WL	0.2875	B
Mean	Control	38.6142	41.3166	0.438406	0.618251	6.15483	6.795	88.0857	67.7118	6.27434	6.09807	94.36	73.8099		CK+WL	0.0258	C	CK+WL	0.185	C
	WL	21.5777	23.9763	0.0426217	0.28905	1.60529	4.3788	541.694	83.7069	13.6719	5.49965	555.366	89.2066		GA3+WL	0.0313	C	GA3+WL	0.2075	C
	CK+WL	29.5186	32.7022	0.025562	0.186145	1.07766	2.88394	1188.71	179.594	27.3526	11.4076	1216.07	191.002
	GA3+WL	27.3288	30.0466	0.0309591	0.209253	1.24331	3.44294	887.41	144.546	22.0606	8.74914	909.47	153.295		Tr_1			Tr_2
															Treat	Mean	Homogeneous Groups	Treat	Mean	Homogeneous Groups
SE	Control	0.837972	2.2482	0.00286192	0.0520053	0.057535	0.242526	1.92187	5.05044	0.131384	0.369462	2.03159	5.03483		Control	6.1525	A	Control	6.7975	A
	WL	1.60825	0.650871	0.00583447	0.0127263	0.0797327	0.181366	96.8221	5.81717	1.58659	0.248727	97.9041	5.83748		WL	1.605	B	WL	4.38	B
	CK+WL	1.41533	0.729209	0.00235206	0.0181357	0.0303191	0.127203	131.119	13.6409	0.659012	0.570914	131.452	13.7013		CK+WL	1.0775	C	CK+WL	2.8825	C
	GA3+WL	0.905735	1.29199	0.00176114	0.0131705	0.0605873	0.169758	32.5737	6.62808	0.757358	0.285948	33.0777	6.88387		GA3+WL	1.2425	C	GA3+WL	3.44	C
		Pn_1	Pn_2	Gs_1	Gs_2	Tr_1	Tr_2	WUEint (Pn/Gs)_1	WUEint (Pn/Gs)_2	WUEins (Pn/Tr)_1	WUEins (Pn/Tr)_2	WUE_1	WUE_2
	C vs WL	44.1198	41.9695	90.2781	53.2472	73.9182	35.5585	-514.963	-23.6224	-117.901	9.8133	-488.561	-20.86		WUE_1				WUE_2
	C vs CK+WL	23.555	20.8498	94.1693	69.8917	82.4908	57.5579	-1249.5	-165.233	-335.944	-87.0689	-1188.75	-158.775		Treat	Mean	Homogeneous Groups		Treat	Mean	Homogeneous Groups
	C vs GA3+WL	29.2262	27.2771	92.9383	66.154	79.7994	49.3313	-907.439	-113.473	-251.599	-43.4739	-863.83	-107.689		Control	94.4	D		Control	73.81	C
															WL	555.4	C		WL	89.21	C
	CK+WL	36.8014	36.394	-40.0259	-35.601	-32.8681	-34.1386	119.444	114.551	100.065	107.424	118.967	114.112		CK+WL	1216.1	A		CK+WL	191	A
	GA3+WL	26.6527	25.3183	-27.3631	-27.6065	-22.5489	-21.3726	63.8211	72.6812	61.3571	59.0855	63.7604	71.8431		GA3+WL	909.5	B		GA3+WL	153.3	B
															WUEi (Pn/Gs)_1				WUEi (Pn/Gs)_2
															Treat	Mean	Homogeneous Groups		Treat	Mean	Homogeneous Groups
															Control	88.1	D		Control	67.71	C
															WL	541.7	C		WL	83.71	C
															CK+WL	1188.7	A		CK+WL	179.59	A
															GA3+WL	887.4	B		GA3+WL	144.55	B
															WUE (Pn/Tr)_1				WUE (Pn/Tr)_2
															Treat	Mean	Homogeneous Groups		Treat	Mean	Homogeneous Groups
															Control	6.278	D		Control	6.1	C
															WL	13.673	C		WL	5.5	C
															CK+WL	27.355	A		CK+WL	11.407	A
															GA3+WL	22.06	B		GA3+WL	8.75	B

## Sheet: Figure 2
Treat	Rep	Chl a_1	Chl a_2	Chl b_1	Chl b_2	Cl (a+b)_1	Cl (a+b)_2
Control	1	2.09831	2.16691	0.828477	0.843768	2.92679	3.01068			1	Denotes "After stress" measurements
Control	2	2.18436	2.24869	0.81	0.842394	2.99436	3.09108			2	Denotes "After Recovery" measurements
Control	3	2.02	2.11287	0.783676	0.8249	2.80368	2.93777
Control	4	1.98836	1.9627	0.76	0.923106	2.74836	2.8858
WL	1	1.09364	1.15036	0.302922	0.33154	1.39656	1.4819			Chl_a_1						Total Chl_1
WL	2	0.976051	1.29761	0.270997	0.30299	1.24705	1.6006			Treat	Mean	Homogeneous Groups				Treat	Mean	Homogeneous Groups
WL	3	1.05745	1.15745	0.250674	0.311853	1.30812	1.4693			Control	2.0725	A				Control	2.8675	A
WL	4	1.01027	1.21027	0.275239	0.32467	1.28551	1.53494			WL	1.035	D				WL	1.3125	D
CK+WL	1	1.75425	1.86366	0.7107	0.8031	2.46495	2.66676			CK+WL	1.8	B				CK+WL	2.4675	B
CK+WL	2	1.85526	1.89436	0.59408	0.720782	2.44934	2.61514			GA3+WL	1.6625	C				GA3+WL	2.2775	C
CK+WL	3	1.8	1.95437	0.685821	0.752032	2.48582	2.7064
CK+WL	4	1.79	1.9809	0.675155	0.70227	2.46516	2.68317			Chl_a_2						Total Chl_2
GA3+WL	1	1.70772	1.77877	0.533995	0.64129	2.24171	2.42006			Treat	Mean	Homogeneous Groups				Treat	Mean	Homogeneous Groups
GA3+WL	2	1.81038	1.86172	0.646545	0.703077	2.45693	2.5648			Control	2.1225	A				Control	2.9825	A
GA3+WL	3	1.51739	1.80948	0.613267	0.731562	2.13066	2.54105			WL	1.205	C				WL	1.52	D
GA3+WL	4	1.60597	1.75147	0.674235	0.724912	2.28021	2.47638			CK+WL	1.92	B				CK+WL	2.67	B
										GA3+WL	1.8	B				GA3+WL	2.5	C
	Mean	2.07276	2.12279	0.795538	0.858542	2.86829	2.98133			Chl_b_1
		1.03435	1.20392	0.274958	0.317763	1.30931	1.52168			Treat	Mean	Homogeneous Groups
		1.79988	1.92332	0.666439	0.744546	2.46632	2.66787			Control	0.795	A
		1.66037	1.80036	0.617011	0.70021	2.27738	2.50057			WL	0.275	C
										CK+WL	0.6675	B
	SE	0.0437931	0.0602255	0.0149938	0.0219457	0.0561794	0.0446562			GA3+WL	0.615	B
		0.0258638	0.0339668	0.0107528	0.00639451	0.0316975	0.029901
		0.0209103	0.0268923	0.0252429	0.0220542	0.00748199	0.0193658			Chl_b_2
		0.0633429	0.023638	0.0303487	0.0205607	0.0677286	0.0326989			Treat	Mean	Homogeneous Groups
										Control	0.855	A
	C vs WL	50.0978	43.2859	65.4375	62.988	54.3523	48.9596			WL	0.315	C
Con vs Trt	C vs CK+WL	13.165	9.39657	16.2279	13.2779	14.0145	10.5143			CK+WL	0.7425	B
	C vs GA3+WL	19.8957	15.189	22.4411	18.442	20.6017	16.1257			GA3+WL	0.6975	B
Stress VS Trt	CK+WL	74.0104	59.7548	142.379	134.308	88.3678	75.3233
	GA3+WL	60.5225	49.5414	124.402	120.356	73.9373	64.3291

## Sheet: Figure 3
Treat	Rep	MDA_1	MDA_2	H2O2_1	H2O2_2	Prol_1	Prol_2	TSS_1	TSS_2	Phenol_1	Phenol_2	Flavonoid_1	Flavonoid_2
Control	1	0.0829961	0.101075	4.45036	4.4617	1.07935	1.1021	80.9518	83.4519	0.803	0.8246	7.68211	7.57			1	Denotes "After stress" measurements
Control	2	0.0880142	0.113755	5.25938	5.27688	0.907603	0.912649	83.7788	84.0481	1.03	0.7396	8.08039	8.7548			2	Denotes "After Recovery" measurements
Control	3	0.0899755	0.100245	5.10223	5.12046	0.849856	0.89158	90.5625	91.5096	0.47	0.6539	6.9528	7.2316
Control	4	0.0921703	0.102072	4.67009	4.74134	0.915133	0.930708	81.0851	84.7788	0.5197	0.6349	9.52866	8.1268			MDA_1				MDA_2
WL	1	0.261679	0.196431	10.575	8.61402	1.41294	1.29986	113.508	102.142	0.99	0.8656	9.40194	9.368			Treat	Mean	Homogeneous Groups		Treat	Mean	Homogeneous Groups
WL	2	0.257192	0.181945	10.4143	7.67054	1.35972	1.36228	110.683	107.05	1.26	0.9175	10.2476	9.7604			Control	0.0883	C		Control	0.1043	C
WL	3	0.225734	0.192541	11.1438	7.68067	1.50038	1.40195	108.087	104.342	1.13	0.92698	10.9692	8.8952			WL	0.246	A		WL	0.2088	A
WL	4	0.239524	0.264135	9.44196	7.80304	1.843	1.39101	115.788	99.9962	1.07	0.803689	11.6157	8.6952			CK+WL	0.1513	B		CK+WL	0.1382	B
CK+WL	1	0.150177	0.130857	6.01982	5.18638	2.01745	1.99651	142.702	142.615	1.5898	0.9947	10.1752	10.7268			GA+WL	0.1642	B		GA+WL	0.143	B
CK+WL	2	0.143226	0.141036	7.3308	4.61679	2.11321	1.81691	150.625	137.962	1.4856	1.3285	16.408	11.6188
CK+WL	3	0.149807	0.145263	7.15313	5.05862	2.0535	1.83068	146.212	135.8	1.4752	1.2062	15.133	14.0272			H2O2_1				H2O2_2
CK+WL	4	0.161871	0.135695	6.48348	5.2775	1.996	1.69915	152.981	141.965	1.5227	1.1997	16.2907	13.214			Treat	Mean	Homogeneous Groups		Treat	Mean	Homogeneous Groups
GA+WL	1	0.17128	0.178388	7.92188	5.86469	1.88427	1.69352	136.558	140.465	1.4139	1.1723	12.6218	10.862			Control	4.87	C		Control	4.9	C
GA+WL	2	0.171774	0.149109	8.14152	5.90924	1.92882	1.58184	140.99	130.527	1.4441	1	13.4183	11.2316			WL	10.393	A		WL	7.04	A
GA+WL	3	0.189419	0.160346	7.65446	6.19103	1.6386	1.87269	126.393	130.165	1.3267	1.11221	13.4313	11.2376			CK+WL	7.52	B		CK+WL	5.6625	B
GA+WL	4	0.182516	0.174337	7.39393	5.40237	1.94908	1.58614	141.777	124.904	1.3568	1.05314	14.67	12.5964			GA+WL	7.775	B		GA+WL	5.84	B
Mean	Control	0.088289	0.104287	4.87051	4.90009	0.937985	0.95926	84.0946	85.9471	0.705675	0.71325	8.06099	7.9208			Prol_1				Prol_2
	WL	0.246032	0.208763	10.3937	7.94206	1.52901	1.36377	112.016	103.383	1.1125	0.878442	10.5586	9.1797			Treat	Mean	Homogeneous Groups		Treat	Mean	Homogeneous Groups
	CK+WL	0.15127	0.138213	6.74681	5.03482	2.04504	1.83581	148.13	139.586	1.51832	1.18227	14.5017	12.3967			Control	0.94	C		Control	0.9618	C
	GA+WL	0.178747	0.165545	7.77795	5.84183	1.85019	1.68355	136.43	131.515	1.38537	1.08441	13.5353	11.4819			WL	1.7525	B		WL	1.4888	B
																CK+WL	2.045	A		CK+WL	1.8358	A
SE	Control	0.00195787	0.0031781	0.187441	0.184374	0.0493247	0.0482811	2.25218	1.87391	0.130636	0.0435453	0.54207	0.333673			GA+WL	1.95	A		GA+WL	1.7585	A
	WL	0.00828517	0.0187094	0.35375	0.225999	0.108606	0.0228889	1.67521	1.51044	0.0569173	0.0283349	0.476154	0.239505
	CK+WL	0.00387754	0.00313745	0.303314	0.146397	0.0256332	0.061158	2.28946	1.62819	0.0259141	0.069187	1.47059	0.748343			TSS_1				TSS_2
	GA+WL	0.00440156	0.00670456	0.162177	0.163333	0.0718164	0.0681341	3.53736	3.24826	0.0266483	0.0371936	0.422955	0.381741			Treat	Mean	Homogeneous Groups		Treat	Mean	Homogeneous Groups
																Control	84.09	C		Control	85.95	C
	C vs WL	-178.667	-100.182	-113.402	-62.0799	-63.0098	-42.1692	-33.203	-20.2864	-57.6505	-23.1605	-30.9841	-15.8936			WL	112.52	B		WL	103.38	B
Con vs Trt	C vs CK1+WL	-71.3351	-32.5315	-38.5235	-2.7495	-118.025	-91.378	-76.1467	-62.4087	-115.159	-65.7589	-79.9	-56.5082			CK+WL	147.13	A		CK+WL	134.59	A
	C vs GA1+WL	-102.457	-58.7402	-59.6946	-19.2188	-97.2519	-75.5047	-62.2335	-53.019	-96.3191	-52.0382	-67.9117	-44.9588			GA+WL	140.68	A		GA+WL	125.02	A
Stress VS Trt	CK1+WL	-38.5162	-33.7944	-35.0878	-36.6056	33.7494	34.6128	32.2393	35.0183	36.4787	34.5877	37.3449	35.0447			Phenol_1				Phenol_2
	GA1+WL	-27.348	-20.7019	-25.1671	-26.4444	21.0061	23.4478	21.7942	27.2122	24.5281	23.4472	28.1924	25.0793			Treat	Mean	Homogeneous Groups		Treat	Mean	Homogeneous Groups
																Control	0.7057	C		Control	0.7133	C
																WL	1.1625	B		WL	0.8784	B
																CK+WL	1.4183	A		CK+WL	1.1823	A
																GA+WL	1.3854	A		GA+WL	1.1089	A
																Flavonoid_1				Flavonoid_2
																Treat	Mean	Homogeneous Groups		Treat	Mean	Homogeneous Groups
																Control	8.061	C		Control	7.921	C
																WL	10.559	B		WL	9.43	B
																CK+WL	14.502	A		CK+WL	11.647	A
																GA+WL	13.535	A		GA+WL	10.732	A

## Sheet: Table 1
Treat	Rep	Pht_1	Pht_2	shoot FW_1	shoot FW_2	root FW_1	root FW_2	girth_1	girth_2
Control	1	16.6	28.95	2.43	9.18	0.3	1.81	4.25	7.15			1	Denotes "After stress" measurements
Control	2	15.34	33.15	2.25	9.01	0.42	1.74	5.475	6.95			2	Denotes "After Recovery" measurements
Control	3	17.55	36.5	2.54	10.96	0.38	2.04	5.21	7.06
Control	4	18.36	34.25	2.12	9.56	0.37	1.99	4.33	6.99			Treatments	Shoot height (cm)		Shoot weight (g)		Root weight (g)		Girth width ()
WL	1	11.35	21.45	1.61	5.73	0.21	1.15	3.09	5.01				During waterlogging	After recovery	During waterlogging	After recovery	During waterlogging	After recovery	During waterlogging	After recovery
WL	2	12.05	20.45	1.62	5.67	0.23	0.99	3.25	5.3			Control	16.9625	33.2125	2.335	9.6775	0.3675	1.895	4.81625	7.0375
WL	3	11.65	24.04	1.42	5.26	0.19	1.44	2.61	4.03			WL	11.2875	21.485	1.47	5.415	0.215	1.215	3.03	4.7725
WL	4	10.1	20	1.23	5	0.23	1.28	3.17	4.75			CK+WL	15.29	28.94	2.0275	7.335	0.2925	1.6475	4.1225	6.405
CK+WL	1	15.54	27.94	1.96	7.04	0.3	1.77	4.14	6.59			GA3+WL	14.17	26.62	1.865	6.78	0.27	1.505	3.9575	5.92125
CK+WL	2	15.7	28.35	2.05	6.74	0.29	1.65	3.89	6
CK+WL	3	15.99	30.57	2.19	7.81	0.31	1.5	4.25	6.88			Pht_1				Pht_2
CK+WL	4	13.93	28.9	1.91	7.75	0.27	1.67	4.21	6.15			Treat	Mean	Homogeneous Groups		Treat	Mean	Homogeneous Groups
GA3+WL	1	14.75	25.25	1.79	6.07	0.27	1.58	3.8	6.395			Control	16.963	A		Control	33.212	A
GA3+WL	2	13.58	26.75	1.84	7.48	0.3	1.64	3.72	5.885			WL	11.288	C		WL	21.485	D
GA3+WL	3	14.75	27.43	1.94	6.97	0.28	1.64	4.04	5.55			CK+WL	15.29	B		CK+WL	28.94	B
GA3+WL	4	13.6	27.05	1.89	6.6	0.23	1.16	4.27	5.855			GA3+WL	14.17	B		GA3+WL	26.62	C
Mean	Control	16.9625	33.2125	2.335	9.6775	0.3675	1.895	4.81625	7.0375			shoot_1				shoot_2
	WL	11.2875	21.485	1.47	5.415	0.215	1.215	3.03	4.7725			Treat	Mean	Homogeneous Groups		Treat	Mean	Homogeneous Groups
	CK+WL	15.29	28.94	2.0275	7.335	0.2925	1.6475	4.1225	6.405			Control	2.335	A		Control	9.6775	A
	GA3+WL	14.17	26.62	1.865	6.78	0.27	1.505	3.9575	5.92125			WL	1.47	C		WL	5.415	C
												CK+WL	2.0275	B		CK+WL	7.335	B
SE	Control	0.649492	1.58264	0.0933185	0.442688	0.0249583	0.0714726	0.30904	0.0438511			GA3+WL	1.865	B		GA3+WL	6.78	B
	WL	0.420998	0.903959	0.0922858	0.173325	0.00957427	0.0956121	0.143759	0.271796
	CK+WL	0.462799	0.577826	0.0614241	0.264402	0.00853913	0.0557337	0.0807646	0.201846			root_1				root_2
	GA3+WL	0.334888	0.477389	0.0322749	0.297574	0.0147196	0.115866	0.12439	0.175112			Treat	Mean	Homogeneous Groups		Treat	Mean	Homogeneous Groups
		Pht_1	Pht_2	shoot_1	shoot_2	root_1	root_2	girth_1	girth_2			Control	0.3675	A		Control	1.895	A
	C vs WL	33.4562	35.3105	37.045	44.0455	41.4966	35.8839	37.088	32.1847			WL	0.215	C		WL	1.215	C
Con vs Trt	C vs CK1+WL	9.85999	12.8641	13.1692	24.2056	20.4082	13.0607	14.4044	8.98757			CK+WL	0.2925	B		CK+WL	1.6475	AB
	C vs GA1+WL	16.4628	19.8495	20.1285	29.9406	26.5306	20.5805	17.8303	15.8615			GA3+WL	0.27	B		GA3+WL	1.505	BC
Stress VS Trt	CK1+WL	35.4596	34.6986	37.9252	35.4571	36.0465	35.5967	36.0561	34.2064			girth_1				girth_2
	GA1+WL	25.5371	23.9004	26.8707	25.2078	25.5814	23.8683	30.6106	24.0702			Treat	Mean	Homogeneous Groups		Treat	Mean	Homogeneous Groups
												Control	4.8175	A		Control	7.0375	A
												WL	3.03	C		WL	4.7725	C
												CK+WL	4.1225	B		CK+WL	6.405	B
												GA3+WL	3.9575	B		GA3+WL	5.925	B

## Sheet: Table 2
Treat	Rep	pod length	ppp_tot	SW	yi
Control	1	8.4325	34	69.8339	18.08
Control	2	8.8925	32	76.247	16.05			Treatments	Pod length (cm)	Total number of pods per plant	Total seed weight per plant (g)	Yield
Control	3	7.99375	30	71.3417	15.3			Control	8.46406	33	72.6013	16.465
Control	4	8.5375	36	72.9825	16.43			WL	7.34875	21	55.4562	9.51125
WL	1	7.675	22	59.9774	8.93			CK+WL	8.03125	26	66.5601	11.9387
WL	2	7.215	21	54.9261	9.54			GA3+WL	7.9198	25	64.0004	11.4863
WL	3	6.865	21	50.7796	10.315
WL	4	7.64	20	56.1418	9.26
CK+WL	1	7.75	30	64.7135	10.955
CK+WL	2	8.15	25	65.8893	11.445			pod length				ppp_tot				SW
CK+WL	3	8.15	23	68.4817	11.54			Treat	Mean	Homogeneous Groups		Treat	Mean	Homogeneous Groups		Treat	Mean	Homogeneous Groups
CK+WL	4	8.075	26	67.156	13.815			Control	8.4625	A		Control	33	A		Control	72.6	A
GA3+WL	1	7.67702	24	61.0802	12.39			WL	7.3525	C		WL	21	C		WL	55.457	C
GA3+WL	2	8.0391	25	64.7305	10.95			CK+WL	8.0325	AB		CK+WL	26	B		CK+WL	66.56	B
GA3+WL	3	7.89167	26	65.1348	11.025			GA3+WL	7.92	B		GA3+WL	25	B		GA3+WL	64	B
GA3+WL	4	8.07143	25	65.056	11.58
								yi
Mean	Control	8.46406	33	72.6013	16.465			Treat	Mean	Homogeneous Groups
	WL	7.34875	21	55.4562	9.51125			Control	16.465	A
	CK+WL	8.03125	26	66.5601	11.9387			WL	9.512	C
	GA3+WL	7.9198	25	64.0004	11.4863			CK+WL	11.943	B
								GA3+WL	11.487	B
SE	Control	0.185099	1.29099	1.37483	0.587289
	WL	0.192174	0.408248	1.89435	0.295497
	CK+WL	0.0954021	1.47196	0.811775	0.638414
	GA3+WL	0.0898864	0.408248	0.977305	0.332399
	C vs WL	13.177	36.3636	23.6154	42.2335
Con vs Trt	C vs CK1+WL	5.11353	21.2121	8.32098	27.4901
	C vs GA1+WL	6.43023	24.2424	11.8467	30.2384
Stress VS Trt	CK1+WL	9.28729	23.8095	20.0229	25.5224
	GA1+WL	7.77076	19.0476	15.4071	20.7649
			25	20	25
			20	15	20
